| Change in performance time (percentage) when Cue or Mixed cue was provided |           |      |       |           |            |           |  |           |      |       |           |            |           |  |
|----------------------------------------------------------------------------|-----------|------|-------|-----------|------------|-----------|--|-----------|------|-------|-----------|------------|-----------|--|
|                                                                            | Session 1 |      |       |           |            |           |  | Session 2 |      |       |           |            |           |  |
| id                                                                         | Random    | Cue  | diff% | Mixed cue | diff_rand% | diff_cue% |  | Random    | Cue  | diff% | Mixed cue | diff_rand% | diff_cue% |  |
| 1                                                                          | 43,8      | 44   | 0,5   | 39,9      | -8,9       | -9,3      |  | 41,6      | 39,3 | -5,5  | 39,7      | -4,6       | 1,0       |  |
| 2                                                                          | 48,6      | 49,9 | 2,7   | 46,6      | -4,1       | -6,6      |  | 49,6      | 49,6 | 0,0   | 49,8      | 0,4        | 0,4       |  |
| 3                                                                          | 44,5      | 39,2 | -11,9 | 38,7      | -13,0      | -1,3      |  | 39,5      | 39,1 | -1,0  | 36,9      | -6,6       | -5,6      |  |
| 4                                                                          | 57,6      | 57,1 | -0,9  | 48,0      | -16,7      | -15,9     |  | 43,1      | 41,6 | -3,5  | 41,9      | -2,8       | 0,7       |  |
| 5                                                                          | 43,7      | 42,4 | -3,0  | 41,4      | -5,3       | -2,4      |  | 40,8      | 40,7 | -0,2  | 40,0      | -2,0       | -1,7      |  |
| 6                                                                          | 57,8      | 53,7 | -7,1  | 51,0      | -11,8      | -5,0      |  | 53,9      | 52,2 | -3,2  | 53,2      | -1,3       | 1,9       |  |
| 7                                                                          | 57,8      | 64,9 | 12,3  | 66,9      | 15,7       | 3,1       |  | 52,3      | 60,2 | 15,1  | 59,9      | 14,5       | -0,5      |  |
| 8                                                                          | 45,3      | 55,6 | 22,7  | 47,9      | 5,7        | -13,8     |  | 47,3      | 50,1 | 5,9   | 47,5      | 0,4        | -5,2      |  |
| 9                                                                          | 47,4      | 40,6 | -14,3 | 41,2      | -13,1      | 1,5       |  | 38,2      | 35,3 | -7,6  | 36,0      | -5,8       | 2,0       |  |
| 10                                                                         | 37,8      | 42,2 | 11,6  | 43,2      | 14,3       | 2,4       |  | 37,9      | 34,9 | -7,9  | 38,6      | 1,8        | 10,6      |  |
| 11                                                                         | 43,2      | 40,3 | -6,7  | 41,3      | -4,4       | 2,5       |  | 39,9      | 38,8 | -2,8  | 38,7      | -3,0       | -0,3      |  |
| 12                                                                         | 45,6      | 42,9 | -5,9  | 43,0      | -5,7       | 0,2       |  | 40,3      | 44,9 | 11,4  | 48,0      | 19,1       | 6,9       |  |
| 13                                                                         | 33,3      | 33,1 | -0,6  | 31,4      | -5,7       | -5,1      |  | 32,2      | 28,8 | -10,6 | 29,8      | -7,5       | 3,5       |  |
| 14                                                                         | 36        | 34   | -5,6  | 32,3      | -10,3      | -5,0      |  | 33,4      | 30,2 | -9,6  | 34,1      | 2,1        | 12,9      |  |
| 15                                                                         | 33,7      | 33   | -2,1  | 33,1      | -1,8       | 0,3       |  | 34,0      | 26,7 | -21,5 | 29,8      | -12,4      | 11,6      |  |
| 16                                                                         | 47,3      | 41,3 | -12,7 | 39,2      | -17,1      | -5,1      |  | 40,7      | 37,9 | -6,9  | 36,7      | -9,8       | -3,2      |  |
| 17                                                                         | 44,4      | 41,2 | -7,2  | 51,2      | 15,3       | 24,3      |  | 46,1      | 38,0 | -17,6 | 41,5      | -10,0      | 9,2       |  |
| 18                                                                         | 41,1      | 41,6 | 1,2   | 38,9      | -5,4       | -6,5      |  | 36,2      | 36,5 | 0,8   | 37,8      | 4,4        | 3,6       |  |
| 19                                                                         | 56,9      | 56,5 | -0,7  | 53,1      | -6,7       | -6,0      |  | 56,7      | 51,4 | -9,3  | 47,4      | -16,4      | -7,8      |  |
| 20                                                                         | 73,1      | 72,1 | -1,4  | 82,8      | 13,3       | 14,8      |  | 66,9      | 69,0 | 3,1   | 74,0      | 10,6       | 7,2       |  |
| 21                                                                         | 53,1      | 52,9 | -0,4  | 49,1      | -7,5       | -7,2      |  | 55,6      | 47,8 | -14,0 | 47,3      | -14,9      | -1,0      |  |
| 22                                                                         | 53,2      | 47,3 | -11,1 | 50,6      | -4,9       | 7,0       |  | 47,4      | 50,7 | 7,0   | 50,0      | 5,5        | -1,4      |  |
| 23                                                                         | 39        | 31,7 | -18,7 | 37,0      | -5,1       | 16,7      |  | 37,9      | 34,5 | -9,0  | 36,0      | -5,0       | 4,3       |  |
| 24                                                                         | 35,1      | 34,3 | -2,3  | 31,8      | -9,4       | -7,3      |  | 33,2      | 29,8 | -10,2 | 29,1      | -12,3      | -2,3      |  |
| 25                                                                         | 40,6      | 34,8 | -14,3 | 34,3      | -15,5      | -1,4      |  | 38,7      | 34,0 | -12,1 | 36,1      | -6,7       | 6,2       |  |
| 26                                                                         | 47,9      | 45,8 | -4,4  | 46,8      | -2,3       | 2,2       |  | 47,4      | 42,3 | -10,8 | 42,6      | -10,1      | 0,7       |  |
| 27                                                                         | 43,2      | 45   | 4,2   | 47,2      | 9,3        | 4,9       |  | 47,0      | 44,5 | -5,3  | 45,1      | -4,0       | 1,3       |  |
| 28                                                                         | 48,1      | 47,4 | -1,5  | 56,6      | 17,7       | 19,4      |  | 42,0      | 42,4 | 1,0   | 42,8      | 1,9        | 0,9       |  |
| 29                                                                         | 46,4      | 38,8 | -16,4 | 40,3      | -13,1      | 3,9       |  | 39,8      | 38,9 | -2,3  | 37,0      | -7,0       | -4,9      |  |
| 30                                                                         | 50,3      | 46,9 | -6,8  | 42,0      | -16,5      | -10,4     |  | 43,3      | 40,7 | -6,0  | 41,5      | -4,2       | 2,0       |  |
| 31                                                                         | 50,8      | 41,8 | -17,7 | 40,4      | -20,5      | -3,3      |  | 47,5      | 40,5 | -14,7 | 36,7      | -22,7      | -9,4      |  |
